# Supplementary material
Source: PubMed Central journal article supplement (PMC3641890)
Supplement: NIHMS457456-supplement-FIGS_S1-S9__TABLES_S1_S4_S5.pdf [file NIHMS457456-supplement-FIGS_S1-S9__TABLES_S1_S4_S5.pdf]

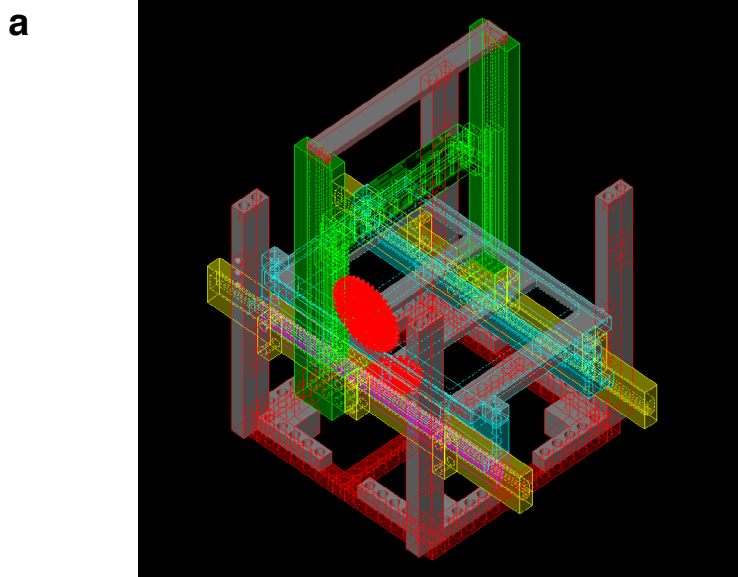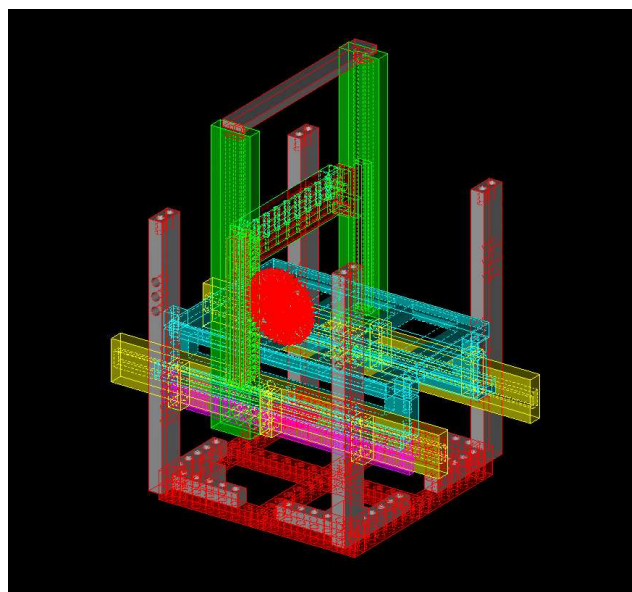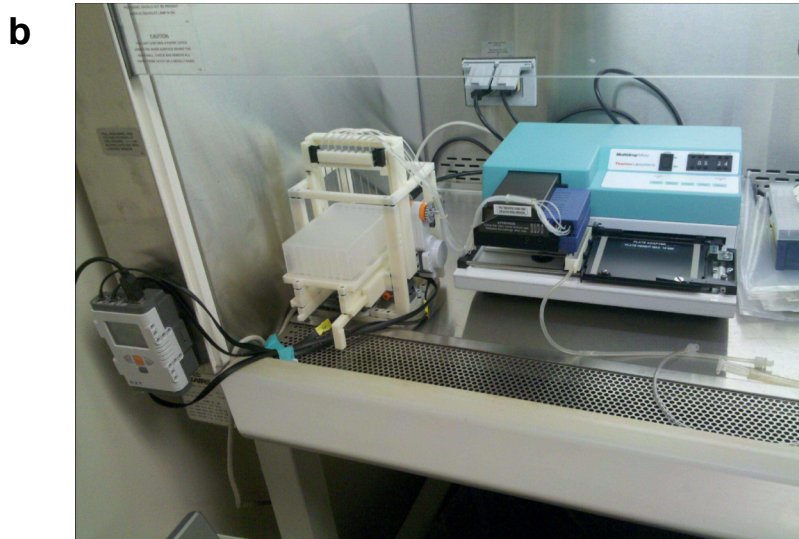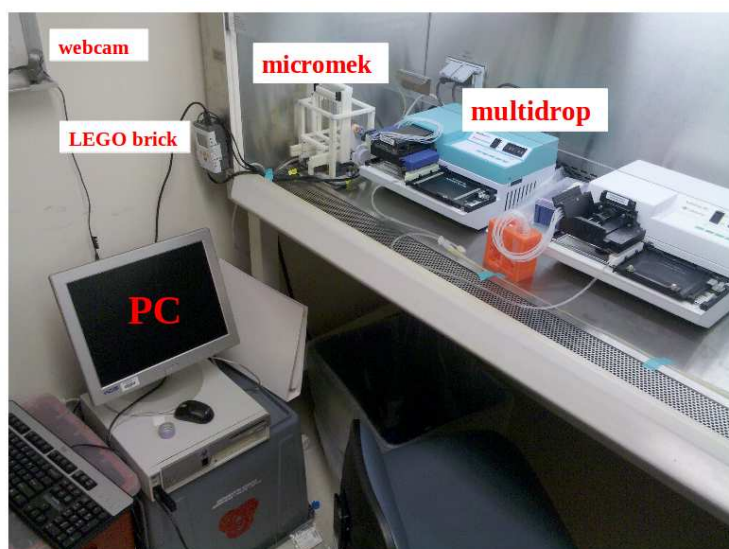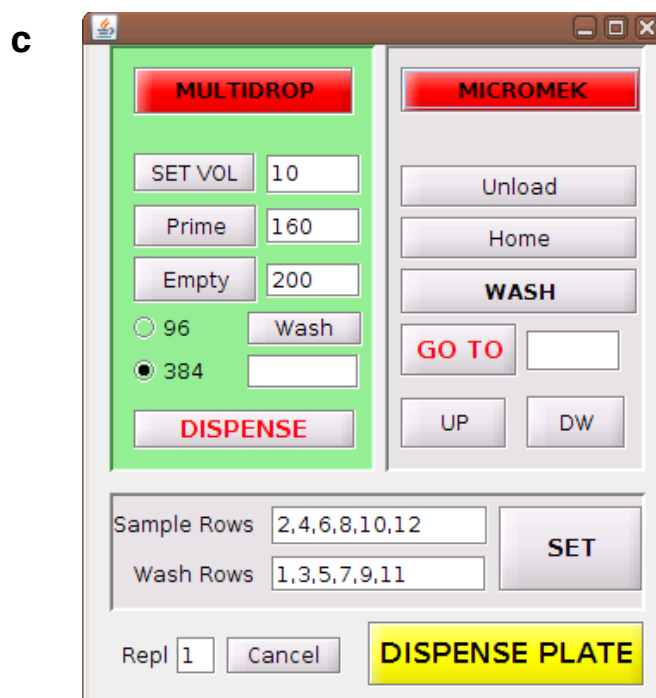

**The MICROMEK liquid handling device.** The instrument was built using the LEGO Mindstorms kit (<http://mindstorms.lego.com>) and plastic parts manufactured using a 3D printer (uPrint, <http://www.uprint3dprinting.com/>). Parts design was done using BRL-CAD (<http://brlcad.org/>). All the CAD files and scheduling software running the MICROMEK and Multidrop are available upon request. A video of the instrument in action is available at: <http://www.youtube.com/watch?v=CU-dOno6FzI>. (a) CAD drawings of MICROMEK viewed from different angles with individual parts colored. (b) The MICROMEK connected to a Multidrop dispenser (Thermo) in a tissue culture hood with different components annotated. The whole setup has very small footprint and is operated through a PC running custom-built scheduling software. The instruments can also be run remotely using desktop virtualization software and a webcam. (c) The control panel for running the MICROMEK and Multidrop from a PC. The software was developed in Java. The communication with the Multidrop is via a serial RS232 port using the standard Multidrop command set per manufacturer's documentation. The PC talks to the LEGO brick through a USB connection using a custom-built driver.

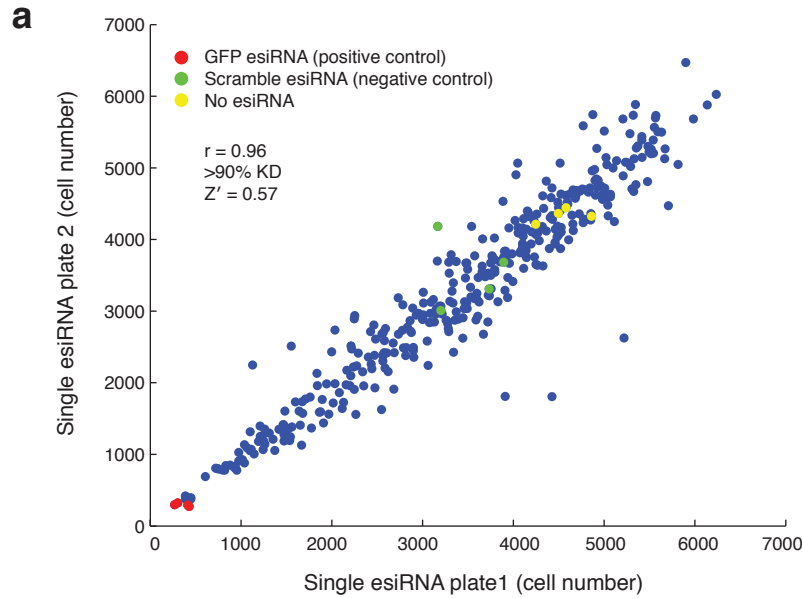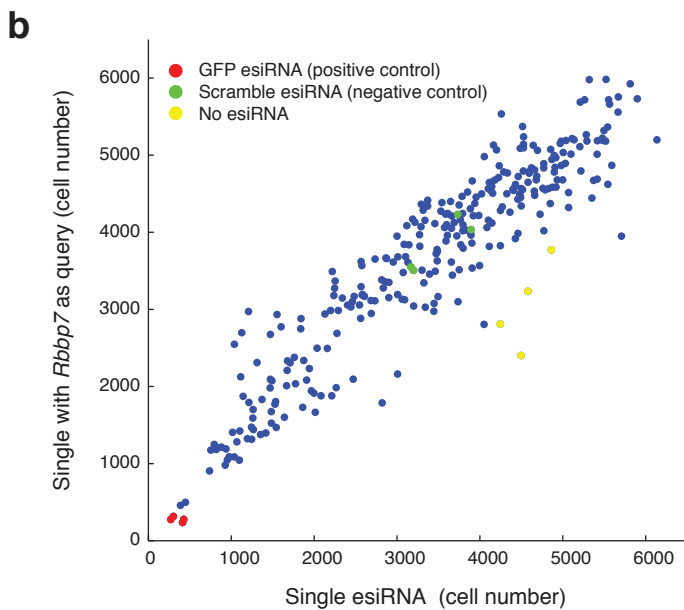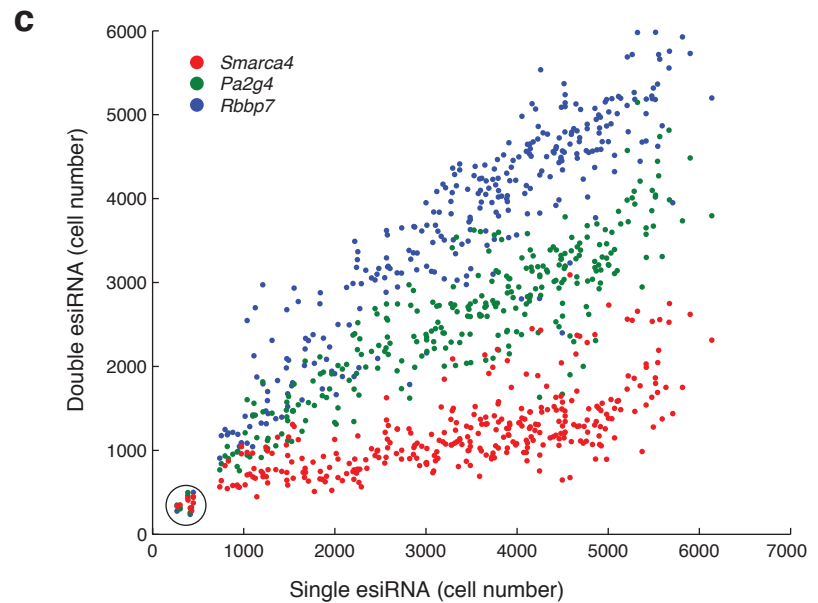

**Data reproducibility.** (a) Reproducibility of the experimental protocol. Raw data corresponding to two independent replicate single esiRNA experiments are presented with data-points for the positive control (GFP), mock-transfected and scramble control indicated. Pearson correlation, percentage difference between scramble and GFP and screening Z-factor are listed (b) The addition of a second esiRNA causes a mild effect consistent with the assumptions used for deriving the GIs scores (*S-scores*). (c) Fitness defects associated with a particular gene knockdown are easily observable upon combination with second esiRNAs. Raw data for three query genes (*Smarca4*, *Pa2g4* and *Rbbp7*) is shown. Each point represents the combination of a query with another gene knockdown, for a total of 384 per query. Data points corresponding to GFP positive controls are circled. For all three panels raw cell numbers are used.

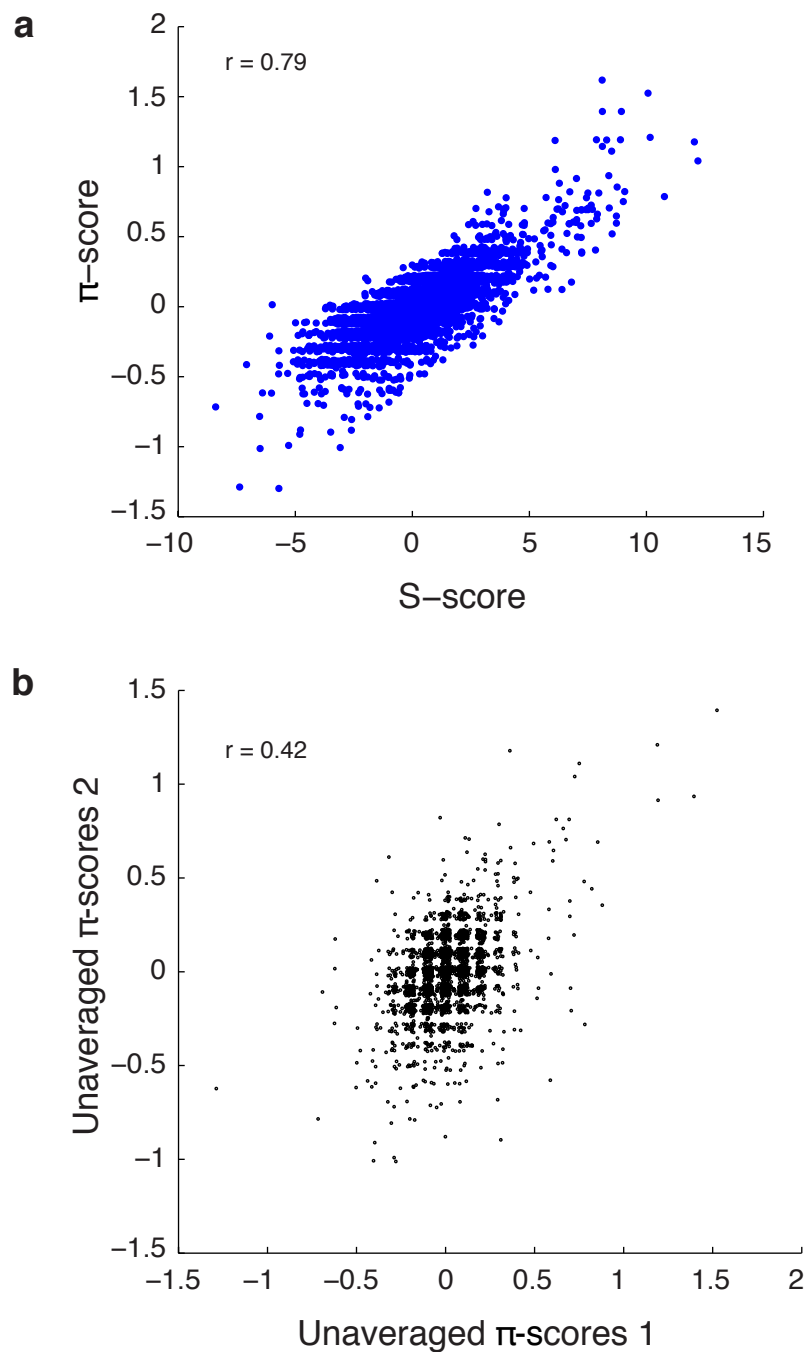

**Comparison of GI scoring systems.** (a) Comparison between the *S-score* (used in this study) and the  $\pi$ -score methodology used in a similar study in *D. melanogaster*. Both scoring protocols make similar assumptions about the sparseness of strong GIs. Raw data was scored using the *S-score* (horizontal axis) or  $\pi$ -score (vertical axis) and Pearson correlation shown. (b) Data reproducibility based on biological replicates using the  $\pi$ -score. Each point on the scatter plot represents a pair-wise GI measurement from 2 independent biological replicates.

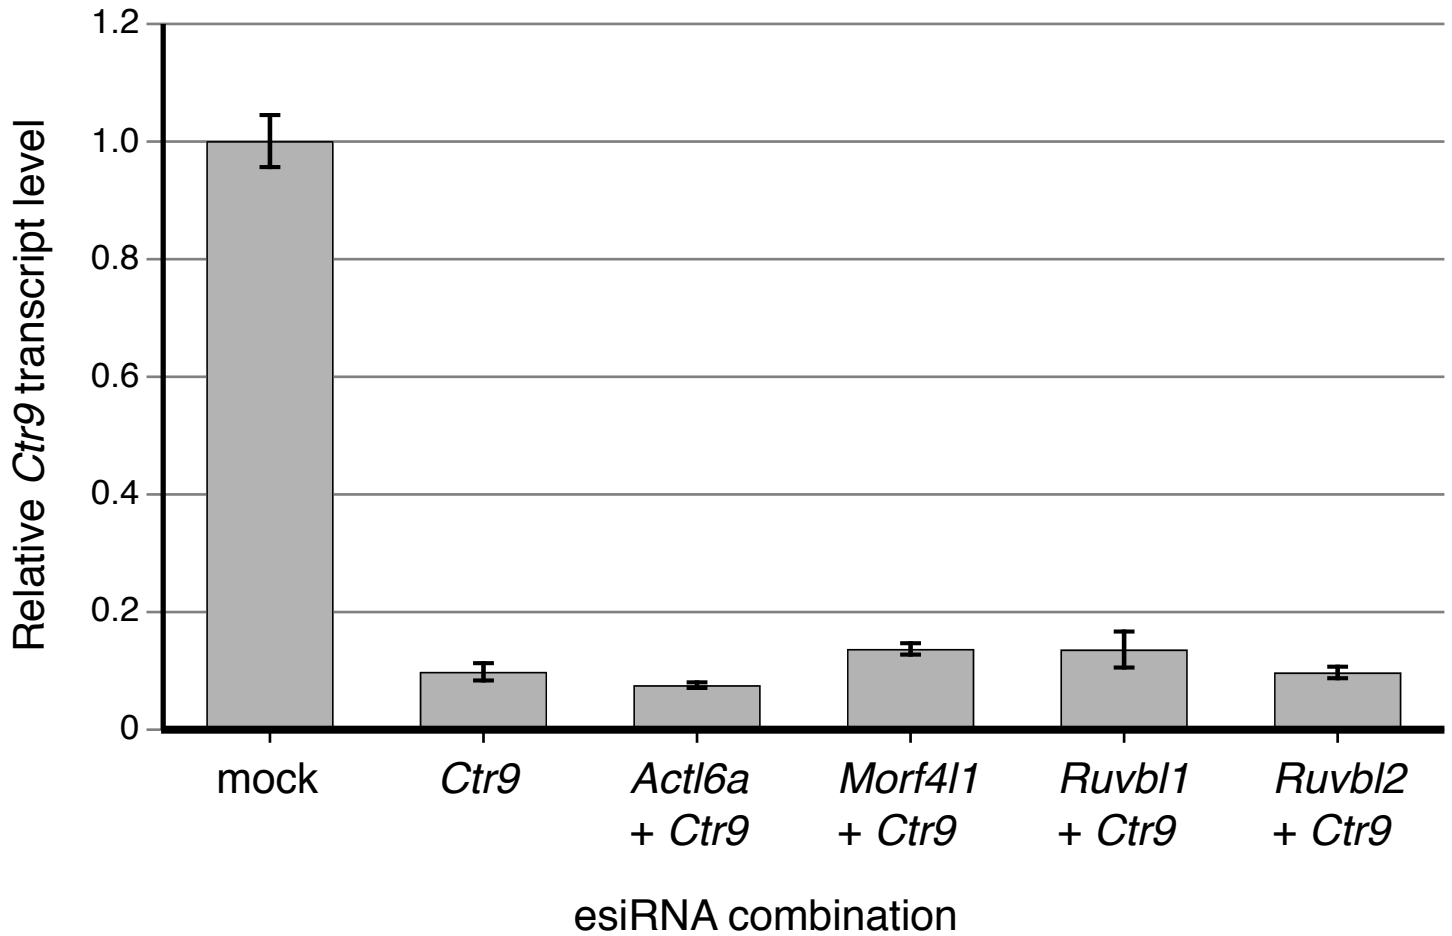

**Knock-down efficiencies in the presence of a second esiRNA targeting a different gene.** Cells were either mock-transfected, transfected only with *Ctr9* esiRNA or a combination of esiRNA against *Ctr9* and esiRNA against another gene. *Ctr9* transcript levels were quantified by qRT-PCR and data presented is relative to the mock-transfected sample. Error bars represent standard deviation and are derived from four replicates (n = 4).

Supplementary Figure 5 – Immunoblot analysis using two independent *Leo1* esiRNA designs.

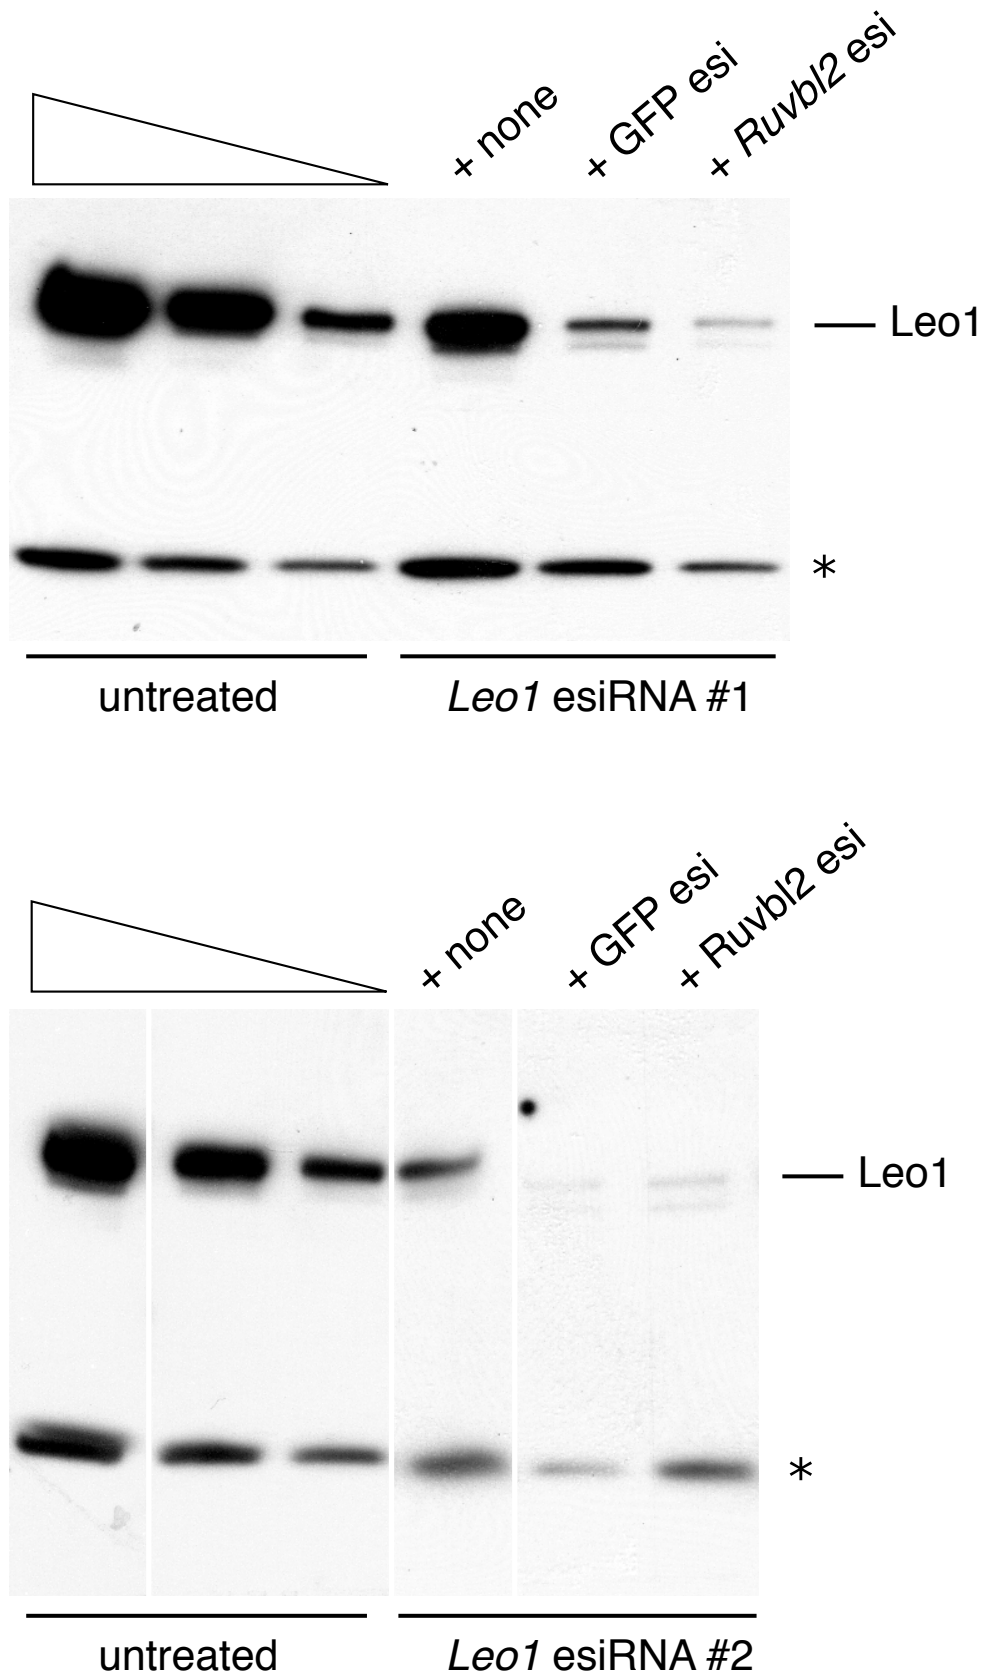

**Immunoblot analysis using two independent *Leo1* esiRNA designs.** Cells were harvested 72 hours post transfection. As *Leo1* depletion causes severe growth phenotype, equalizing protein concentration between samples proved to be difficult. Therefore different amounts of untreated cell extract were used (left part of the blots) and equivalent amounts of the total cell culture were loaded. Anti-*Leo1* polyclonal antibody (Proteintech), detecting a 105 kDa band, was used. An unidentified cross-reacting band of approximately 30kD, marked by as '\*', serves as a reference for protein levels in each lane.

Supplementary Figure 6 – Cutoff definitions for positive and negative GIs

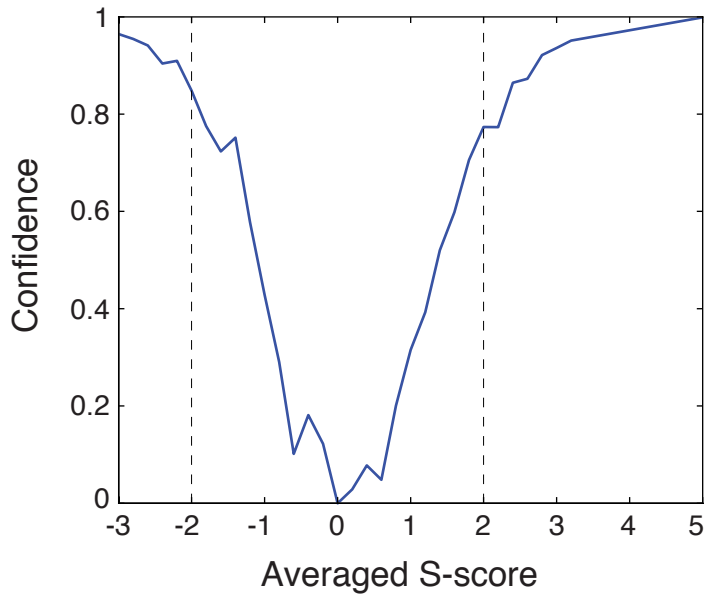

**Cutoff definitions for positive and negative GIs.** Cutoffs were defined at approximately 75% confidence that the observed interaction is real based on a confidence curve as in Collins et al, 2006.

# Supplementary Figure 7 – GI scores derived from alternative esiRNA designs for the same gene are highly correlated

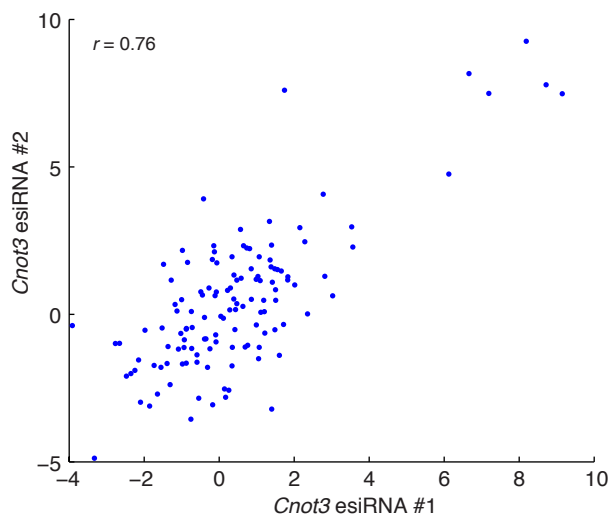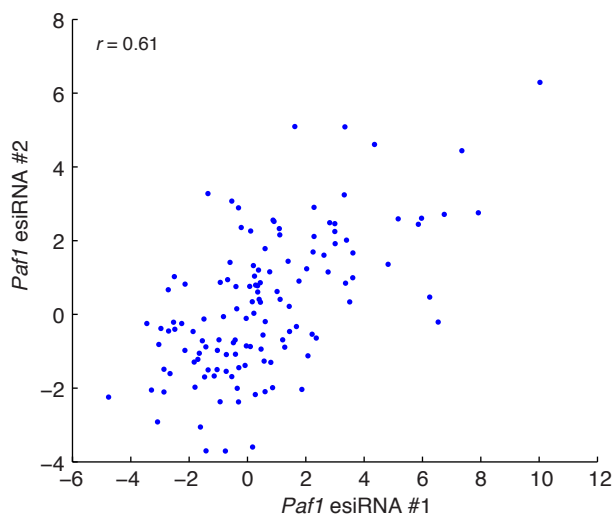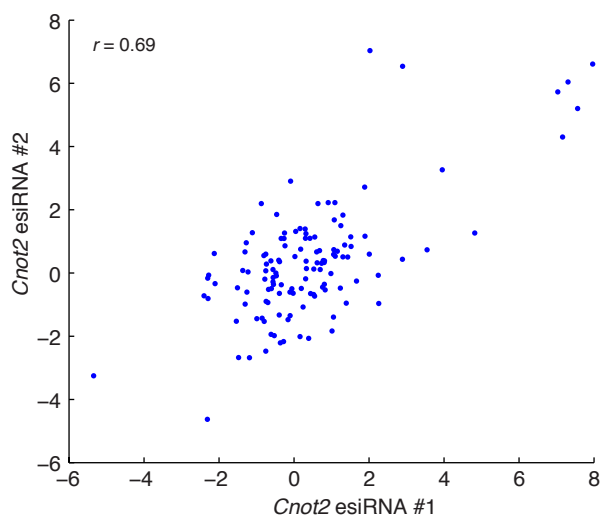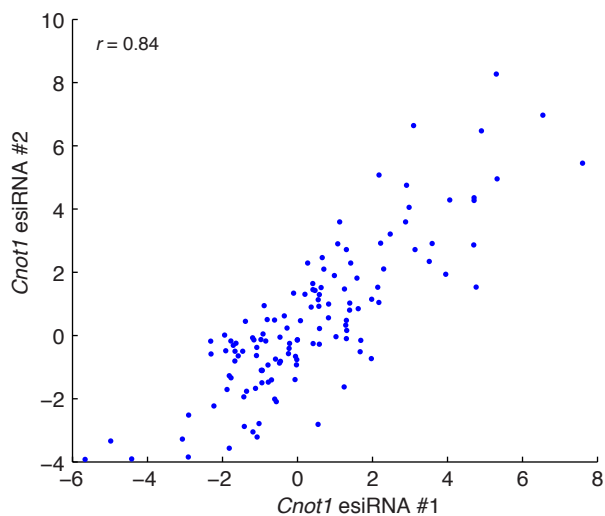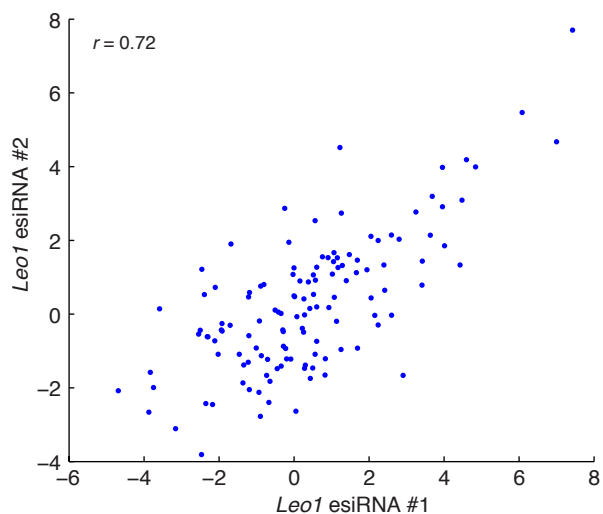

**GI scores derived from alternative esiRNA designs for the same gene are highly correlated.** For five genes, two alternative esiRNA designs targeting different parts of the transcript were used to generate GI profiles and these were plotted against each other. The values correspond to *S-scores* and the correlation coefficients were provided.

## Supplementary Figure 8 – Comparison of genetic data to HumanNet interactions

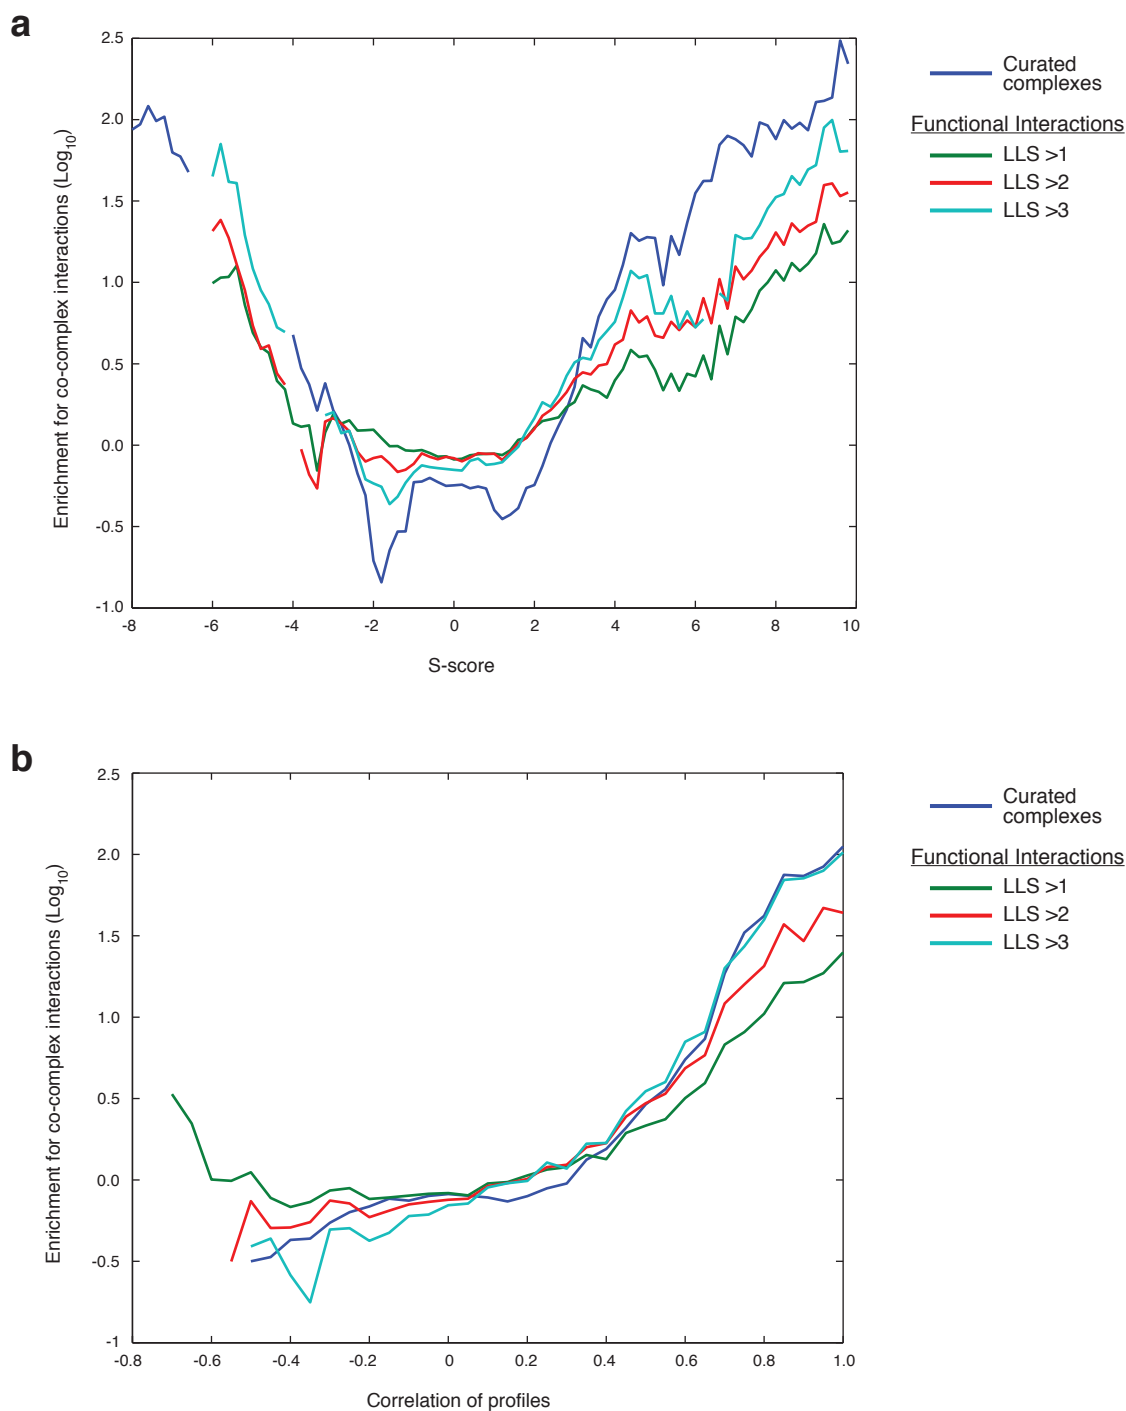

**Comparison of genetic data to HumanNet interactions.** (a) Correspondence of  $S$ -scores and (b) Pearson correlation of profiles on curated and unbiased functional interaction dataset called HumanNet at low (LLS > 1) to high (LLS > 3) stringency cutoffs. To compute the enrichment over random ( $y$ -axis), one first computes the fraction  $f$  of interactions at each score  $x$  that overlap with each dataset (bin size of 1.5). The enrichment is the ratio  $f/r$ , where  $r$  is the fraction of random protein pairs that overlap with each dataset.



Supplementary Figure 9 – Synergistic effect of the PARP inhibitor ABT-888 and knock-down of *Rtf1*, a member of the PAF1 complex

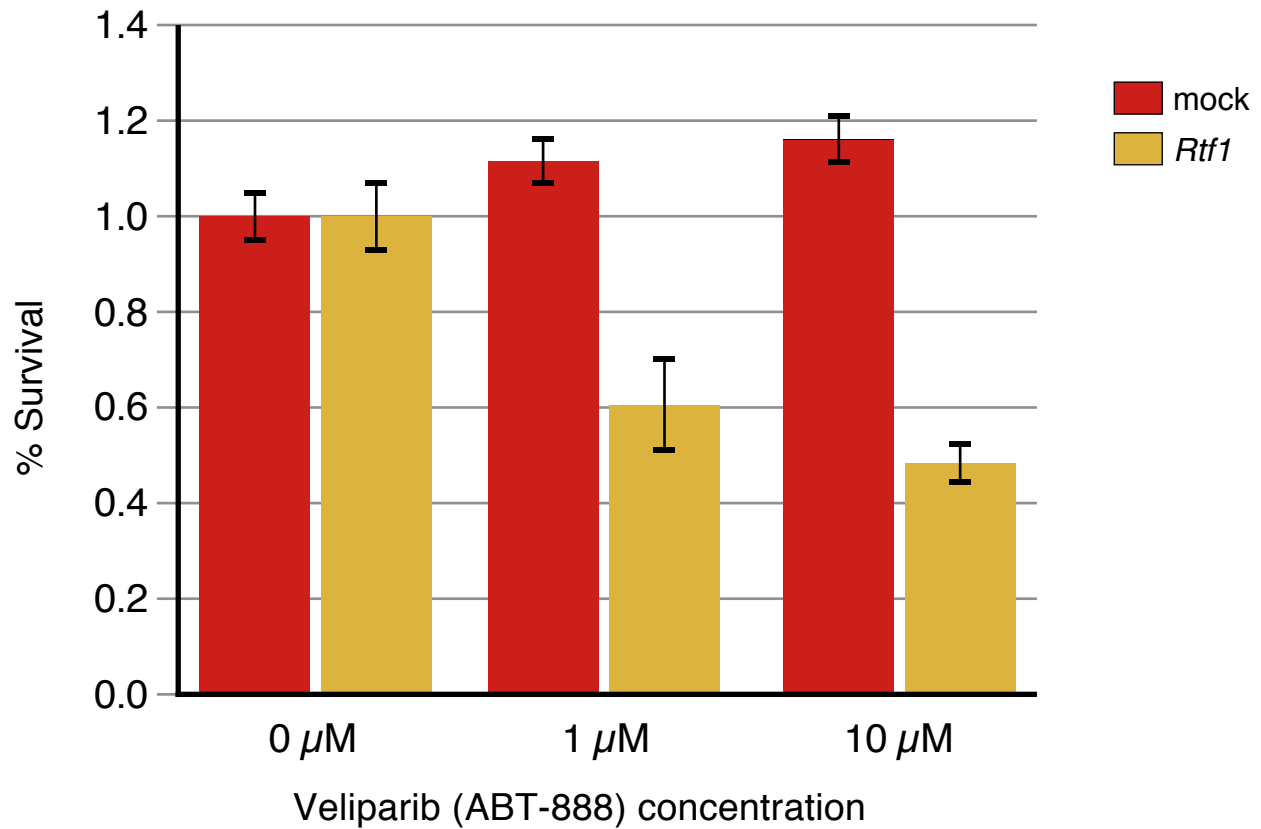

**Synergistic effect of the PARP inhibitor ABT-888 and knock-down of *Rtf1*, a member of the PAF1 complex.** Cells were either mock-transfected (mock) or transfected with *Rtf1* esiRNA. 24 hours post-transfection the cells were treated with ABT-888 at two different concentrations (1 and 10 μM). Cells were counted 72 hours post transfection. Data presented on the graph has been normalized to the respective mock cell counts. Error bars represent standard deviation and are derived from two replicates (n = 2).

Supplementary Table 1'''  
qPCR quantification of transcript levels after esiRNA knockdown.

| <b>gene#</b> | <b>% remaining transcript</b> |
|--------------|-------------------------------|
| Actl6a       | 0.9075192                     |
| Actl6b       | 0.1626677                     |
| Actr8        | 0.2268798                     |
| bard1        | 0.2044755                     |
| Bmi1         | 0.1008302                     |
| Brca1        | 1.7411011                     |
| Cbx3         | 0.1855654                     |
| Cbx4         | 0.5509526                     |
| Cbx5         | 0.3789291                     |
| cdc37        | 0.2300469                     |
| cdc73        | 0.3230882                     |
| Cnot1        | 0.0973956                     |
| Cnot2        | 0.5034778                     |
| cnot3        | 1.1250585                     |
| cnot4        | 0.3609823                     |
| cnot6        | 0.463294                      |
| cnot6l       | 0.2365144                     |
| cnot7        | 0.5823668                     |
| cnot8        | 0.4665165                     |
| Ddx17        | 0.1538931                     |
| Ddx5         | 0.1560413                     |
| Dmap1        | 0.2365144                     |
| Dnmt1        | 0.289172                      |
| Dnmt3a       | 0.1486509                     |
| Dnmt3b       | 0.208772                      |
| Dzip3        | 0.2206757                     |
| Eed          | 0.1755556                     |
| Elp3         | 0.0693481                     |
| Ep400        | 0.4204482                     |
| Epc1         | 1.0069556                     |
| Exosc1       | 0.1215819                     |
| Ezh2         | 0.1719427                     |
| H2afv        | 1.2397077                     |
| H2afz        | 0.0480273                     |
| Hcfc1        | 0.2284579                     |
| Hdac1        | 0.1241366                     |
| Ing1         | 1.9185282                     |
| Ino80        | 0.9930925                     |
| Jarid2       | 0.1907824                     |
| Kat2a        | 0.1830107                     |
| Leo1         | 0.1719427                     |
| Mbd2         | 3.0314331                     |
| Morf4l1      | 0.5987394                     |
| Morf4l2      | 0.0824692                     |
| Mta2         | 0.5212329                     |
| Mtf2         | 0.6328783                     |
| Mybbp1a      | 0.2030631                     |
| Myst1        | 0.2698071                     |
| Ncor2        | 0.4117955                     |
| Paf1         | 0.2660925                     |
| Parp1        | 0.07966                       |
| Parp2        | 0.2534899                     |
| Rbbp4        | 0.4117955                     |
| Rbbp7        | 0.3711309                     |
| Ring1        | 0.3584888                     |
| Rnf168       | 0.1695755                     |
| Rnf2         | 1.7900501                     |
| Rtf1         | 0.2606164                     |
| Ruvbl1       | 0.1051121                     |
| ruvbl2       | 0.3560125                     |
| Sap30l       | 0.5823668                     |
| Satb2        | 0.5743492                     |
| Sin3a        | 0.2044755                     |
| Sin3b        | 0.5703819                     |
| Sirt1        | 0.4475125                     |
| Smarca2      | 1.6817928                     |
| Smarca4      | 0.329877                      |
| Spop1        | 0.1649385                     |
| Ssrp1        | 0.2381595                     |
| Supt16h      | 0.3584888                     |
| Suv420h1     | 1.0424658                     |
| Suv420h2     | 1.0867349                     |
| Suz12        | 0.5321851                     |
| Tbl1x        | 0.2237563                     |
| Tbl1xr1      | 0.2284579                     |
| Tet1         | 0.5248583                     |
| Tet2         | 1.2834259                     |
| Trrap        | 0.5823668                     |

Supplementary Table 4  
Manually curated functional modules and pathways list

| <b>module name</b> | <b>members</b> |         |        |        |       |      |      |      |       |  |
|--------------------|----------------|---------|--------|--------|-------|------|------|------|-------|--|
| INTEGRATOR         | INTS2          | INTS1   | INTS8  | INTS11 | INTS4 |      |      |      |       |  |
| RBBP               | RBBP7          | RBBP4   |        |        |       |      |      |      |       |  |
| PAF                | CDC73          | SUPT16H | PAF1   | LEO1   | CTR9  | RTF1 |      |      |       |  |
| PRC1               | CBX4           | BMI1    | RING1  | EZH2   |       |      |      |      |       |  |
| CNOT-core          | CNOT3          | CNOT2   | CNOT1  |        |       |      |      |      |       |  |
| MORF               | MORF4L2        | MORF4L1 |        |        |       |      |      |      |       |  |
| DDX                | DDX17          | DDX5    |        |        |       |      |      |      |       |  |
| INO80              | IES6           | INO80   | IES2   |        |       |      |      |      |       |  |
| COHESIN            | SMC1A          | SMC3    | SMC1B  |        |       |      |      |      |       |  |
| RUVBL              | RUVBL1         | ACTL6A  | RUVBL2 |        |       |      |      |      |       |  |
| ELONGATOR          | ELP4           | ELP3    |        |        |       |      |      |      |       |  |
| BRCA               | BRCA1          | BARD1   |        |        |       |      |      |      |       |  |
| PARP               | PARP1          | PARP2   |        |        |       |      |      |      |       |  |
| CONDENSIN          | SMC2           | SMC4    |        |        |       |      |      |      |       |  |
| CNOT-extension     | CNOT8          | CNOT7   | CNOT6  | CNOT4  |       |      |      |      |       |  |
| MCM                | MCM7           | MCM6    | MCM4   | MCM2   |       |      |      |      |       |  |
| MEDIATOR           | MED21          | MED11   | MED12  | MED1   | MED6  | MED7 | MED4 | MED9 | MED13 |  |
| UT                 | UTX            | UTY     |        |        |       |      |      |      |       |  |
| P-TEFb             | CCNT1          | CDK9    | ELL    |        |       |      |      |      |       |  |
| SIRT               | SIRT1          | TBL1X   |        |        |       |      |      |      |       |  |
| HDAC               | HDAC1          | HDAC2   |        |        |       |      |      |      |       |  |
| H2A                | H2AFV          | H2AFZ   |        |        |       |      |      |      |       |  |

## Supplementary Table 5

Inter-module GI bundle P-values used in the module map in Figure 4.

| <b>Module1 &lt;--&gt; Module2</b> | <b>P-value</b> | <b>Genetic interaction sign<br/>(1 positive, -1 negative)</b> |
|-----------------------------------|----------------|---------------------------------------------------------------|
| PAF <--> CNOT-core                | 0              | 1                                                             |
| PAF <--> INTEGRATOR               | 0.0083         | 1                                                             |
| SIRT <--> H2A                     | 8.00E-04       | -1                                                            |
| UTX <--> CNOT-core                | 0.0097         | -1                                                            |
| CNOT-core <--> RUVBL              | 3.00E-04       | 1                                                             |
| PAF <--> UTX                      | 3.00E-04       | -1                                                            |
| H2A <--> RBBP                     | 0.0049         | 1                                                             |
| DDX <--> RBBP                     | 0.0096         | 1                                                             |
| MCM <--> RUVBL                    | 0.0027         | -1                                                            |
| MORF <--> PRC1                    | 0.0048         | -1                                                            |
| PAF <--> H2A                      | 0              | 1                                                             |
| PAF <--> HDAC                     | 0.0061         | 1                                                             |
| PAF <--> CONDENSIN                | 0              | -1                                                            |
| PAF <--> RUVBL                    | 0              | 1                                                             |
| MCM <--> PAF                      | 0.0017         | -1                                                            |
| PAF <--> PARP                     | 2.00E-04       | -1                                                            |
| MORF <--> PAF                     | 3.00E-04       | -1                                                            |
| COHESIN <--> INO80                | 0.0071         | -1                                                            |
